# Supplementary material for: Ultrasound-guided lymph node biopsy sampling to study the immunopathogenesis of rheumatoid arthritis: a well-tolerated valuable research tool
Source: PubMed Central journal article supplement (PMC8812012; doi:10.1186/s13075-022-02728-7), 2022-02-03
Supplement: 13075_2022_2728_MOESM1_ESM.pdf [file 13075_2022_2728_MOESM1_ESM.pdf]

**Additional file 1: Questionnaire before ultrasound-guided lymph node biopsy (in Dutch)**

Vraag 1. Geeft u aub uw geslacht aan:

|       |                          |
|-------|--------------------------|
| Man   | <input type="checkbox"/> |
| Vrouw | <input type="checkbox"/> |

Vraag 2. Geeft u aub uw leeftijd aan:

|            |
|------------|
| ..... jaar |
|------------|

De volgende vragen gaan over uw ervaringen in het verleden met betrekking tot het ondergaan van een biopsie of een andere medische procedure.

Vraag 3.

- a. Heeft u ooit eerder een lymfeklierbiopsie onder plaatselijke verdoving ondergaan?

|     |                          |                                                   |
|-----|--------------------------|---------------------------------------------------|
| Nee | <input type="checkbox"/> | Als u 'nee' heeft geantwoord: ga naar vraag 4 aub |
| Ja  | <input type="checkbox"/> |                                                   |

- b. Als u vraag 3a met 'Ja' heeft beantwoord: hoe vaak heeft u eerder een lymfeklierbiopsie onder plaatselijke verdoving ondergaan?

|            |
|------------|
| ..... keer |
|------------|

- c. Als u vraag 3a met 'Ja' heeft beantwoord: wanneer was de laatste keer dat u een lymfeklierbiopsie onder plaatselijke verdoving heeft ondergaan?

|                          |
|--------------------------|
| ...../..... (maand/jaar) |
|--------------------------|

Vraag 4.

a. Heeft u ooit eerder een procedure onder plaatselijke verdoving ondergaan?

|     |                          |                                                   |
|-----|--------------------------|---------------------------------------------------|
| Nee | <input type="checkbox"/> | Als u 'nee' heeft geantwoord: ga naar vraag 5 aub |
| Ja  | <input type="checkbox"/> |                                                   |

b. Als u vraag 4a met 'Ja' heeft beantwoord: hoe vaak heeft u eerder een procedure onder plaatselijke verdoving ondergaan?

..... keer

c. Als u vraag 4a met 'Ja' heeft beantwoord: wanneer was de laatste keer dat u een procedure onder plaatselijke verdoving heeft ondergaan?

...../..... (maand/jaar)

Vraag 5. Waarom heeft u besloten deel te nemen aan de studie? Geef hieronder de reden(en) aan door middel van een kruisje. U kunt meerdere redenen aankruisen.

|                                                                                                                                     |                          |
|-------------------------------------------------------------------------------------------------------------------------------------|--------------------------|
| U heeft een familielid/vriend met reumatoïde artritis (RA) en weet daarom hoe RA iemands leven kan beïnvloeden en wil daarom helpen | <input type="checkbox"/> |
| U wilt helpen om de ziektelast van RA voor toekomstige patiënten te verminderen                                                     | <input type="checkbox"/> |
| U gelooft dat het belangrijk is om, wanneer mogelijk, deel te nemen aan onderzoeksprojecten om de geneeskunde te bevorderen         | <input type="checkbox"/> |
| U heeft over het onderzoek gehoord van uw huisarts/reumatoloog en wil graag helpen                                                  | <input type="checkbox"/> |
| Anders, namelijk.....<br>.....<br>.....<br>.....<br>.....                                                                           | <input type="checkbox"/> |

Vraag 6.

Geeft u aub op onderstaande lijn door middel van een verticaal streepje aan hoe goed u zich voorbereid vindt om de lymfeklierbiopsie te ondergaan met betrekking tot:

- a. het begrijpen van het doel van de procedure en de achtergrondinformatie

\_\_\_\_\_

0 mm 100 mm

Volledig niet begrepen Volledig begrepen

- b. wat te verwachten tijdens de procedure

\_\_\_\_\_

0 mm 100 mm

Volledig niet begrepen Volledig begrepen

- c. nazorg

\_\_\_\_\_

0 mm 100 mm

Volledig niet begrepen Volledig begrepen

- d. mogelijke complicaties

\_\_\_\_\_

0 mm 100 mm

Volledig niet begrepen Volledig begrepen

Vraag 7.

Geeft u aub op onderstaande lijn door middel van een verticaal streepje aan hoe angstig u bent om de biopsie te ondergaan:

\_\_\_\_\_

0 mm 100 mm

Ik ben niet angstig Ik ben zeer angstig

Vraag 8.

Geeft u aub op onderstaande lijn door middel van een verticaal streepje aan in welke mate u tegen het ondergaan van de biopsie opziet:

\_\_\_\_\_

0 mm 100 mm

Ik zie niet op tegen de procedure Ik zie erg op tegen de procedure

Vraag 9.

Geeft u aub hieronder door middel van een kruisje aan of u met de volgende medicatie moest staken in verband met het ondergaan van de biopsie:

|                 |                          |
|-----------------|--------------------------|
| Bloedverdunners | <input type="checkbox"/> |
| Pijnmedicatie   | <input type="checkbox"/> |

Heeft u opmerkingen over deze vragenlijst? Geeft u dan graag hieronder een toelichting.

|                                                                                                                                              |
|----------------------------------------------------------------------------------------------------------------------------------------------|
| .....<br>.....<br>.....<br>.....<br>.....<br>.....<br>.....<br>.....<br>.....<br>.....<br>.....<br>.....<br>.....<br>.....<br>.....<br>..... |
|----------------------------------------------------------------------------------------------------------------------------------------------|

Hartelijk dank voor uw medewerking!
