# Supplementary material for: Ultrasound-guided lymph node biopsy sampling to study the immunopathogenesis of rheumatoid arthritis: a well-tolerated valuable research tool
Source: PubMed Central journal article supplement (PMC8812012; doi:10.1186/s13075-022-02728-7), 2022-02-03
Supplement: 13075_2022_2728_MOESM2_ESM.pdf [file 13075_2022_2728_MOESM2_ESM.pdf]

## Additional file 2: Questionnaire 1 and 5 days after ultrasound-guided lymph node biopsy (in Dutch)

### Vraag 1.

Vergeleken met bloed prikken is de lymfeklierbiopsie (geef hieronder door middel van een kruisje aan wat voor u van toepassing is):

Niet pijnlijk

Zeer pijnlijk

|                          |                          |                          |                          |                          |
|--------------------------|--------------------------|--------------------------|--------------------------|--------------------------|
| <input type="checkbox"/> | <input type="checkbox"/> | <input type="checkbox"/> | <input type="checkbox"/> | <input type="checkbox"/> |
| 1                        | 2                        | 3                        | 4                        | 5                        |

### Vraag 2.

a. Heeft u complicaties ervaren na afloop van de lymfeklierbiopsie?

|     |                          |                                                   |
|-----|--------------------------|---------------------------------------------------|
| Nee | <input type="checkbox"/> | Als u 'nee' heeft geantwoord: ga naar vraag 3 aub |
| Ja  | <input type="checkbox"/> |                                                   |

b. Als u vraag 2a met 'Ja' heeft beantwoord: geeft u aub door middel van een kruisje aan welke complicatie(s) u heeft ervaren:

1. Bloeduitstorting:

|     |                          |
|-----|--------------------------|
| Nee | <input type="checkbox"/> |
| Ja  | <input type="checkbox"/> |

2. Lekkage van het wondje:

|     |                          |
|-----|--------------------------|
| Nee | <input type="checkbox"/> |
| Ja  | <input type="checkbox"/> |

3. Bloeding:

|     |                          |
|-----|--------------------------|
| Nee | <input type="checkbox"/> |
| Ja  | <input type="checkbox"/> |

4. Ontsteking:

|     |                          |
|-----|--------------------------|
| Nee | <input type="checkbox"/> |
| Ja  | <input type="checkbox"/> |

5. Hevige pijn:

|     |                          |
|-----|--------------------------|
| Nee | <input type="checkbox"/> |
| Ja  | <input type="checkbox"/> |

6. Andere complicatie die niet hierboven vermeld staat:

|                            |                          |
|----------------------------|--------------------------|
| Nee                        | <input type="checkbox"/> |
| Ja, namelijk.....<br>..... | <input type="checkbox"/> |

Vraag 3.

a. Welke aspecten van de lymfeklierbiopsie hadden achteraf gezien beter kunnen worden toegelicht/uitgelegd?

|                                                 |                          |
|-------------------------------------------------|--------------------------|
| Geen, ik ben tevreden met de gegeven informatie | <input type="checkbox"/> |
|-------------------------------------------------|--------------------------|

óf:

|                                                   |                          |
|---------------------------------------------------|--------------------------|
| Meer gedetailleerde uitleg over de procedure zelf | <input type="checkbox"/> |
| De verdovingsprocedure                            | <input type="checkbox"/> |
| Nazorg                                            | <input type="checkbox"/> |
| Te verwachten complicaties                        | <input type="checkbox"/> |
| Anders, namelijk .....<br>.....<br>.....          | <input type="checkbox"/> |

b. Als u een van deze opties heeft aangevinkt, beschrijft u aub welke informatie zal helpen om beter voorbereid te zijn op de lymfeklierbiopsie:

.....

.....

.....

.....

.....

Vraag 4.

Zijn er achteraf gezien aanvullingen waarmee u denkt dat de lymfeklierbiopsie beter te verdragen zou zijn geweest?

|                                                                                                        |                          |
|--------------------------------------------------------------------------------------------------------|--------------------------|
| Geen aanvullingen                                                                                      | <input type="checkbox"/> |
| Iemand die stap voor stap tijdens de lymfeklierbiopsie uitlegt wat er gebeurt                          | <input type="checkbox"/> |
| Afleiding tijdens de procedure, bijvoorbeeld door middel van naar muziek of leuke grappen te luisteren | <input type="checkbox"/> |
| Anders, namelijk.....<br>.....<br>.....                                                                | <input type="checkbox"/> |

Vraag 5.

a. Zou u overwegen om nog een keer een lymfeklierbiopsie te ondergaan?

|          |                          |
|----------|--------------------------|
| Nee      | <input type="checkbox"/> |
| Ja       | <input type="checkbox"/> |
| Neutraal | <input type="checkbox"/> |

b. Geeft u aub commentaar op uw keuze:

|                         |                          |
|-------------------------|--------------------------|
| .....<br>.....<br>..... | <input type="checkbox"/> |
|-------------------------|--------------------------|

Vraag 6.

a. Zou u iemand anders aansporen om mee te doen aan een studie waarbij lymfeklierbiopten van een lymfeklier in de lies worden genomen?

|          |                          |
|----------|--------------------------|
| Nee      | <input type="checkbox"/> |
| Ja       | <input type="checkbox"/> |
| Neutraal | <input type="checkbox"/> |

b. Geeft u aub commentaar op uw keuze:

|                         |                          |
|-------------------------|--------------------------|
| .....<br>.....<br>..... | <input type="checkbox"/> |
|-------------------------|--------------------------|

Vraag 7.

Zou u het op prijs stellen wanneer u op de hoogte wordt gebracht over de studie en de studieresultaten nadat de studie is afgerond?

|     |                          |
|-----|--------------------------|
| Nee | <input type="checkbox"/> |
| Ja  | <input type="checkbox"/> |

Heeft u opmerkingen over deze vragenlijst? Geeft u dan graag hieronder een toelichting.

|                                                    |
|----------------------------------------------------|
| .....<br>.....<br>.....<br>.....<br>.....<br>..... |
|----------------------------------------------------|

Voor deze vragenlijsten voor en na de ingreep:

Indien van toepassing, zou u willen aangeven welke vragen voor u moeilijk te beantwoorden waren of niet goed te begrijpen waren (onduidelijk)?

Zou u hierbij willen aangeven hoe de betreffende vraag volgens u beter gesteld kan worden?

.....

.....

.....

.....

.....

.....

.....

.....

.....

.....

.....

.....

Hartelijk dank voor uw medewerking!
