# Supplementary material for: Ultrasound-guided lymph node biopsy sampling to study the immunopathogenesis of rheumatoid arthritis: a well-tolerated valuable research tool
Source: PubMed Central journal article supplement (PMC8812012; doi:10.1186/s13075-022-02728-7), 2022-02-03
Supplement: 13075_2022_2728_MOESM3_ESM.pdf [file 13075_2022_2728_MOESM3_ESM.pdf]

**Additional file 3: Explanatory statements mentioned when motives before biopsy were noted as “other”**

---

**Other explanatory statements for motives before biopsy**

---

My son-in-law motivated me / My son-in-law participates in the study

I have rheumatoid arthritis myself

To solve my own symptoms

Because I was asked

I hope RA can be cured in the future and I will not be hindered anymore by this disease

For study purposes

Because participating in research is important

---
