# Supplementary material for: Ultrasound-guided lymph node biopsy sampling to study the immunopathogenesis of rheumatoid arthritis: a well-tolerated valuable research tool
Source: PubMed Central journal article supplement (PMC8812012; doi:10.1186/s13075-022-02728-7), 2022-02-03
Supplement: 13075_2022_2728_MOESM5_ESM.pdf [file 13075_2022_2728_MOESM5_ESM.pdf]

### Additional file 5: Self-reported complications at day 5

|                 | Number of participants |
|-----------------|------------------------|
| Overall         | 17 / 34                |
| - Hematoma      | 15                     |
| - Wound leakage | 5                      |
| - Infection     | 0                      |
| - Bleeding      | 0                      |
| - Severe pain   | 3                      |

Participants self-reported complications on the questionnaire and could choose multiple options.
