# Supplementary material for: Ultrasound-guided lymph node biopsy sampling to study the immunopathogenesis of rheumatoid arthritis: a well-tolerated valuable research tool
Source: PubMed Central journal article supplement (PMC8812012; doi:10.1186/s13075-022-02728-7), 2022-02-03
Supplement: 13075_2022_2728_MOESM6_ESM.pdf [file 13075_2022_2728_MOESM6_ESM.pdf]

**Additional file 6: Explanatory statements that participants mentioned for their choice of yes/neutral/no considering a second ultrasound-guided lymph node biopsy or encouraging another to do so**

| Clarifying statement for second participation when answered yes, no or neutral                                                                                                                                                                                                                                                                                                                                                                                                                                                                                                                                                                                                                                                                                                                                                                                                                                                                                                                                                                 | Clarifying statement for encouraging others to participate when answered yes, no or neutral                                                                                                                                                                                                                                                                                                                                                                                                                                                                                                 |
|------------------------------------------------------------------------------------------------------------------------------------------------------------------------------------------------------------------------------------------------------------------------------------------------------------------------------------------------------------------------------------------------------------------------------------------------------------------------------------------------------------------------------------------------------------------------------------------------------------------------------------------------------------------------------------------------------------------------------------------------------------------------------------------------------------------------------------------------------------------------------------------------------------------------------------------------------------------------------------------------------------------------------------------------|---------------------------------------------------------------------------------------------------------------------------------------------------------------------------------------------------------------------------------------------------------------------------------------------------------------------------------------------------------------------------------------------------------------------------------------------------------------------------------------------------------------------------------------------------------------------------------------------|
| <u>Yes</u>                                                                                                                                                                                                                                                                                                                                                                                                                                                                                                                                                                                                                                                                                                                                                                                                                                                                                                                                                                                                                                     | <u>Yes</u>                                                                                                                                                                                                                                                                                                                                                                                                                                                                                                                                                                                  |
| <p>The biopsy went 100% better than I expected beforehand</p> <p>It was less painful than expected</p> <p>Biopsy was not painful and it is important for research</p> <p>If it aids medicine in finding a cure</p> <p>A second biopsy would not be a problem</p> <p>It went better than expected</p> <p>The value for future patients outweighs the little pain and discomfort I endured</p> <p>I have experienced no problems with the biopsy</p> <p>(I would not do it to have fun,) but if necessary, no problem</p> <p>I barely felt it and it is for a very good cause</p> <p>If it is necessary for research</p> <p>I would for research</p> <p>I do not mind. It does not hurt, so I would undergo a second biopsy</p> <p>If it is important for research</p> <p>If it is necessary for further research</p> <p>If it contributes to knowledge about RA, I would consider it</p> <p>The procedure was not too painful and doable</p> <p>The procedure went fine. I did experience some pain, but they immediately responded to that</p> | <p>I would explain that a biopsy seems way worse than it actually is</p> <p>It is for a good cause</p> <p>I have already encouraged another</p> <p>We should help each other</p> <p>Because others can benefit from it</p> <p>Only if this person is mentally and physically up to undergo the procedure and feels the personal need to contribute to research</p> <p>Because research is very important</p> <p>To understand more about the disease. The general benefit is also very important.</p> <p>As humans we should help each other</p> <p>If the study is of great importance</p> |

| <u>Neutral</u>                                                                                                                                                                                                                                                                       | <u>Neutral</u>                                                                                                                                                                                                                                                                                                 |
|--------------------------------------------------------------------------------------------------------------------------------------------------------------------------------------------------------------------------------------------------------------------------------------|----------------------------------------------------------------------------------------------------------------------------------------------------------------------------------------------------------------------------------------------------------------------------------------------------------------|
| <p>It depends on the study goal and necessity of the study</p> <p>It depends the goal of the study</p> <p>Only if it is really needed</p> <p>Currently, I experience too much pain from RA so two study participations is enough for me</p> <p>I would do it to benefit research</p> | <p>Everyone should decide for themselves</p> <p>I do not know anyone with RA , so I do not know who to ask</p> <p>Depends on the goal of the study</p> <p>I would not know who</p> <p>Everyone should decide for themselves</p> <p>I would describe my experience and leave the decision up to that person</p> |
| <u>No</u>                                                                                                                                                                                                                                                                            | <u>No</u>                                                                                                                                                                                                                                                                                                      |
| <p>Very painful</p> <p>Once is enough</p>                                                                                                                                                                                                                                            | <p>Very painful experience</p> <p>Because the people I know, would not do it</p>                                                                                                                                                                                                                               |
