# Supplementary material for: Ultrasound-guided lymph node biopsy sampling to study the immunopathogenesis of rheumatoid arthritis: a well-tolerated valuable research tool
Source: PubMed Central journal article supplement (PMC8812012; doi:10.1186/s13075-022-02728-7), 2022-02-03
Supplement: 13075_2022_2728_MOESM8_ESM.pdf [file 13075_2022_2728_MOESM8_ESM.pdf]

**Additional file 8: Questionnaire 1 and 5 days after the ultrasound-guided lymph node biopsy (in English)**

Question 1.

Compared to venipuncture, I find the lymph node biopsy procedure (please check the appropriate box):

Not painful

Very painful

|                          |                          |                          |                          |                          |
|--------------------------|--------------------------|--------------------------|--------------------------|--------------------------|
| <input type="checkbox"/> | <input type="checkbox"/> | <input type="checkbox"/> | <input type="checkbox"/> | <input type="checkbox"/> |
| 1                        | 2                        | 3                        | 4                        | 5                        |

Question 2.

a. Have you experienced any complications following the procedure?

|     |                          |                                                     |
|-----|--------------------------|-----------------------------------------------------|
| No  | <input type="checkbox"/> | If you answered 'no', please continue to question 3 |
| Yes | <input type="checkbox"/> |                                                     |

b. If you answered 'yes' to question 2a, please mark which complication(s) you experienced:

1. Hematoma:

|     |                          |
|-----|--------------------------|
| No  | <input type="checkbox"/> |
| Yes | <input type="checkbox"/> |

2. Wound leakage:

|     |                          |
|-----|--------------------------|
| No  | <input type="checkbox"/> |
| Yes | <input type="checkbox"/> |

3. Bleeding:

|     |                          |
|-----|--------------------------|
| No  | <input type="checkbox"/> |
| Yes | <input type="checkbox"/> |

4. Inflammation:

|     |                          |
|-----|--------------------------|
| No  | <input type="checkbox"/> |
| Yes | <input type="checkbox"/> |

5. Severe pain:

|     |                          |
|-----|--------------------------|
| No  | <input type="checkbox"/> |
| Yes | <input type="checkbox"/> |

6. Other complications, not mentioned before:

|                           |                          |
|---------------------------|--------------------------|
| No                        | <input type="checkbox"/> |
| Yes, namely.....<br>..... | <input type="checkbox"/> |

Question 3.

a. In hindsight, which aspects of the lymph node biopsy procedure could have been better explained?

|                                                        |                          |
|--------------------------------------------------------|--------------------------|
| None, I am content with the information that was given | <input type="checkbox"/> |
|--------------------------------------------------------|--------------------------|

or:

|                                                   |                          |
|---------------------------------------------------|--------------------------|
| More detailed explanation of the procedure itself | <input type="checkbox"/> |
| The anesthetics procedure                         | <input type="checkbox"/> |
| After-care                                        | <input type="checkbox"/> |
| Possible complications                            | <input type="checkbox"/> |
| Other, namely .....<br>.....<br>.....             | <input type="checkbox"/> |

b. If you ticked any of the boxes above, please explain which information you feel should have been given to prepare you for the procedure:

|                                                                  |
|------------------------------------------------------------------|
| <p>.....</p> <p>.....</p> <p>.....</p> <p>.....</p> <p>.....</p> |
|------------------------------------------------------------------|

Question 4.

In hindsight, do you feel anything could have improved your experience during the lymph node biopsy procedure?

|                                                               |                          |
|---------------------------------------------------------------|--------------------------|
| No                                                            | <input type="checkbox"/> |
| Step-by-step explanation of what happens during the procedure | <input type="checkbox"/> |
| Distraction, for instance listening to music or jokes.        | <input type="checkbox"/> |
| Other, namely.....<br>.....<br>.....                          | <input type="checkbox"/> |

Question 5.

a. Would you consider undergoing another lymph node biopsy procedure?

|         |                          |
|---------|--------------------------|
| No      | <input type="checkbox"/> |
| Yes     | <input type="checkbox"/> |
| Neutral | <input type="checkbox"/> |

b. Please explain your choice:

|                         |                          |
|-------------------------|--------------------------|
| .....<br>.....<br>..... | <input type="checkbox"/> |
|-------------------------|--------------------------|

Question 6.

a. Would you encourage someone else to partake in a research study that involves an inguinal lymph node biopsy procedure?

|         |                          |
|---------|--------------------------|
| No      | <input type="checkbox"/> |
| Yes     | <input type="checkbox"/> |
| Neutral | <input type="checkbox"/> |

b. Please explain your choice:

|                         |                          |
|-------------------------|--------------------------|
| .....<br>.....<br>..... | <input type="checkbox"/> |
|-------------------------|--------------------------|

Question 7.

Would you like to be informed about the study results after the study has finished?

|     |                          |
|-----|--------------------------|
| No  | <input type="checkbox"/> |
| Yes | <input type="checkbox"/> |

Please elaborate below, if you have any remarks about this questionnaire.

|                                  |
|----------------------------------|
| .....<br>.....<br>.....<br>..... |
|----------------------------------|

Regarding the questionnaires before and after the procedure: please let us know if any of the questions were unclear and how we might improve these questions.

|                                  |
|----------------------------------|
| .....<br>.....<br>.....<br>..... |
|----------------------------------|

Thank you for your cooperation!
